# Supplementary material
Source: publisher site journal article supplement (https://oneecosystem.pensoft.net/article/download/suppl/4355227/)
Supplement: Supplementary file 1

**Stakeholders engagement for the co-production of maps**

**Table 1.**List of the participants involved in the Workshops

| **Participant** | **Role** | **Technical skills** |
| --- | --- | --- |
| Varese Province | 1 Civil officer with competences on tourism | No |
| Lecco Province | 1 Urban planner. Manager at the urban development planning sector | Yes |
| Ticino park | 1 Landscape architect. Council member | Yes |
| Nord Milano Park | 1 PhD student (Naturalist) | Yes |
| Adda Nord Park | 1 Civil officer with competence on landscape, territorial marketing and Eco museum | Yes |
| Municipality of Cassano | 1 Mayor  1 Urban planner (consultant for the new Local Plan)  1 Assessor with competences on Planning | Yes |

**Table 2.**List of the main activities (related to nature and cultural heritage) provided by participants and divided into hard and soft activities.

| **Participant** | **Activity** | **Hard activity** | **Soft activities** |
| --- | --- | --- | --- |
| Varese Province | Golf  Speleology  Cycling  Trekking  Walking  Climbing  Canoeing  Sailing boat  Swimming  Fishing  Diving  Bird watching | Canoeing  Sailing boat  Diving  Speleology  Climbing | Golf  Cycling  Trekking  Walking  Swimming  Fishing  Bird watching |
| Lecco Province | Trekking  Walking  Cycling  Canoeing  Sailing boat  Skiing  Speleology  Hunting | Trekking  Canoeing  Sailing boat  Skiing  Speleology  Hunting | Walking  Cycling |
| Ticino park | Walking  Cycling  Bird watching  Swimming  Fishing  Hunting  Mushrooming (?)  Popular festival  Picnic  Canoeing  Riding  Watching farm animals  Food and wine tourism  Herbarium  Environmental education | Canoeing  Riding  Hunting | Walking  Cycling  Bird watching  Swimming  Fishing  Mushrooming (?)  Popular festival  Picnic  Watching farm animals  Food and wine tourism  Herbarium  Environmental education |
| Nord Milano Park | Walking  Cycling  Running  Environmental education  Dog walking  Roller skating  Urban gardens | X | Walking  Cycling  Running  Environmental education  Dog walking  Roller skating  Urban gardens |
| Adda Nord Park | Walking  Cycling  Running  Fishing  Bird watching  Canoeing | Canoeing | Walking  Cycling  Running  Fishing  Bird watching |

**Table 3.**List of the data available for typology of activity suggested by the participants

| **Participant** | **Demand** | | | **Notes/data** |
| --- | --- | --- | --- | --- |
| Activity | User category | Distance  Short – S  Long - L) |
| Varese Province | Cycling | Families, sportsman | S/L | [IAT – Informazione e accoglienza turistica](http://www.vareselandoftourism.com/iat-varese)  Monthly tourism  data on Bed &  breakfast, hotels,  Accommodations |
| Trekking, Walking | Families, sportsman | S/L |
| Water-based sports | all | S/L |
| Cultural activities | all | S/L |
| Lecco Province | Bed&breakfast, agritourism and mountain shelter | tourist | S/L | [IAT – Informazione e accoglienza turistica](http://www.provincia.lecco.it/2012/03/13/ufficio-informazione-e-accoglienza-turistica-di-lecco-la-provincia-ripropone-lapertura-domenicale/)  Monthly tourism  data on Bed &  breakfast, hotels,  Accommodations and mountain shelter |
| Environmental education | students | S/L |
| Canoeing, running | sport societies | S/L |
| Walking in group | local residents | S |
| Ticino park |  | Local users more than 500.000 people (the park include 47 municipalities) | S | Information collected from the park info points (175)  Data of cultural activities fromregistered mark (Il germoglio del Ticino) |
| Environmental education | Local users | S |
| Metropolitan area users | L |
| Cycling tourism | Foreigner tourists | L |
| Malpensa airport users | L |
| Parco Nord Milano |  | Families, local users, local residents | S |  |
| Parco Adda Nord | Walking | Families, local users, local residents | S |  |
| Cycling | Foreigner tourists | L |
| Running | Families, local users, local residents | S |
| Fishing | local users, local residents | S |
| Bird watching | Foreigner tourists | L |
| Canoeing | local users, local residents | S |
